# Supplementary material for: In Vivo Damage of the Head-Neck Junction in Hard-on-Hard Total Hip Replacements: Effect of Femoral Head Size, Metal Combination, and 12/14 Taper Design
Source: PubMed Central journal article supplement (PMC5551776; doi:10.3390/ma10070733), 2017-07-01
Supplement: materials-10-00733-s001.pdf [file materials-10-00733-s001.pdf]

**Supplementary File - Table S1.** Clinical information, design parameters, and DRF for the 148 retrieved implants clustered on the basis of the HNJ damage score.

| <b>Bearing couple</b>                           | <b>Ceramic on ceramic</b> |                     |                  | <b>Metal on metal</b> |                     |                  |
|-------------------------------------------------|---------------------------|---------------------|------------------|-----------------------|---------------------|------------------|
| <b>Male taper material</b>                      | <b>Titanium alloy</b>     |                     |                  | <b>Titanium alloy</b> |                     |                  |
| <b>HNJ damage score</b>                         | <b>≥1 and &lt;2</b>       | <b>≥2 and &lt;3</b> | <b>≥3 and ≤4</b> | <b>≥1 and &lt;2</b>   | <b>≥2 and &lt;3</b> | <b>≥3 and ≤4</b> |
| <b>Number of cases</b>                          | 39                        | 20                  | 2                | 24                    | 30                  | 33               |
| <b>Age at implantation (years)</b>              | 55.9 ± 14.7               | 54.4 ± 9.6          | 58.0 ± 4.2       | 53.2 ± 9.1            | 52.2 ± 15.7         | 56.7 ± 12.9      |
| <b>Weight (kg)</b>                              | 77 ± 18                   | 83 ± 19             | 102 ± 11         | 71 ± 21               | 74 ± 20             | 79 ± 15          |
| <b>BMI (kg/m<sup>2</sup>)</b>                   | 26 ± 5                    | 29 ± 6              | 30 ± 3           | 26 ± 5                | 26 ± 5              | 27 ± 4           |
| <b>Implantation time (years)</b>                | 3.7 ± 3.0                 | 8.7 ± 5.2           | 11.1 ± 3.6       | 4.8 ± 3.3             | 5.4 ± 3.0           | 6.8 ± 3.1        |
| <b>Contact length (mm)</b>                      | 11.5 ± 1.3                | 12.0 ± 2.1          | 9.8 ± 1.1        | 12.5 ± 2.0            | 12.4 ± 1.7          | 11.4 ± 1.0       |
| <b>Taper flexural rigidity (Nm<sup>2</sup>)</b> | 167 ± 6                   | 160 ± 19            | 160 ± 1          | 168 ± 5               | 163 ± 16            | 162 ± 10         |
| <b>DRF (m<sup>-2</sup>)</b>                     | 1.8 ± 0.9                 | 2.2 ± 1.3           | 3.7 ± 0.1        | 2.1 ± 1.3             | 1.9 ± 0.7           | 3.1 ± 1.3        |
